# Supplementary material
Source: PubMed Central journal article supplement (PMC2519873)
Supplement: NIHMS56819-supplement-01.pdf [file NIHMS56819-supplement-01.pdf]

David A. Kenny  
March =1, 2003

# *Unit of Analysis*

---

This page provides the practicing researcher with =uidance concerning the unit in the statistical analysis. I thank Charles =udd for helping me with many of the ideas on this page. Any feedback, =ither technical or pedagogical, would be most appreciated.

---

|                |                                                            |
|----------------|------------------------------------------------------------|
| <b>Outline</b> | <b><u>Statement of the Problem</u></b>                     |
|                | <b><u>Independence of =units</u></b>                       |
|                | <b><u>=/FONT&gt;The Measurement of Nonindependence</u></b> |
|                | <b><u>Unit of =eneralization</u></b>                       |
|                | <b><u>=/FONT&gt;Unit of =easurement</u></b>                |
|                | <b><u>=/FONT&gt;Unit of Assignment or Sampling</u></b>     |
|                | <b><u>How Do I Conduct the Analysis?</u></b>               |
|                | <b><u>References</u></b>                                   |

---

## **Statement =f the Problem**

In statistical analysis, =t is sometimes not clear what is the appropriate level of analysis. For =nstance, persons are in groups (e.g., children in classrooms), and either person =r group could be the unit of analysis. (The group would be the unit of =nalysis by computing a mean of those persons who are members of the group.) =ometimes the two units are crossed instead of nested; for example, 30 judges rate =0 targets. Either target, rater, or even observation could be the =nit of analysis. Because nesting (e.g., children in classrooms) is much =ore common than crossing, that case is generally assumed in the following discussion.

## **Independence of Units**

At the heart of statistical =nalysis is replication or the repeated observation of a phenomenon. For a replication to be a true replication, there must be independence of observations. (For example, duplicating your data is not replication!) Independence of observations is presumed in standard =measures of variability. For there to be

independence, two observations are no more likely to be similar (or different) than any other two observations. There are several factors that make units nonindependent (Kenny & Judd, 1986). Observations can be nonindependent because of compositional effects, common fate, and social interaction:

- Compositional effects refer to the fact that sets of observations are already similar before the study even begins.
- Common fate refers to the fact that sets of observations may have common causes.
- Social interaction refers to direct and indirect influence between pairs of observations.

Using math analysis notation, a compositional effect is a curved line between a pair of observations, common fate is spuriousness (the observation caused by a common variable), and social interaction is a direct effect. The nonindependence would be positive if the nonindependent observations were more similar than independent observations; the nonindependence would be negative if the nonindependent observations were more different than independent observations. The degree of nonindependence can be viewed as a correlation coefficient, though it is not usually measured by an ordinary Pearson product-moment correlation.

## The Measurement of Nonindependence

To determine the unit of analysis, an assessment of whether observations are independent is often helpful. That is, the observations that are thought to be nonindependent, may in fact be independent. The measurement of nonindependence can be complicated, but in many cases an intraclass correlation can be used to measure the degree of nonindependence. ([Read about this measure for dyads.](#)) This measure is appropriate when groups of observations are all linked to one another. Kenny and Judd (1996) discuss a wide variety of measures of nonindependence.

## Unit of Generalization

Another factor in deciding the unit of analysis is the level of generalization that the researcher seeks to make. Consider a researcher who measures 10 children in 10 classrooms from 10 different schools, or 1000 children in all. There are three possible levels of generalizations: the student, the classroom, and the school. The simple rule is to conduct the analysis at the level at which one wants to make generalizations. So if one wants to draw conclusions about persons, person should be the unit of analysis. However, as will be seen, this simple rule cannot always be followed.

The researcher should be aware of the *ecological fallacy* (Robinson, 1950). The conclusions drawn from an analysis conducted at a group level may not apply at the individual level. Conversely, analyses at the individual level may not apply to the group level. In principle, the analysis should be conducted at the level at which generalizations should be made. However, there are exceptions to this rule.

## Unit of Measurement

Another consideration is the unit of measurement. Again returning to the example of children, classroom, and school, some variables may be measured on children (e.g., achievement), some on the classroom (e.g., teacher's gender), and some on the school (e.g., school size). Just because one measures a variable at a certain level does not imply that the variable operates at that level. Consider the variable group size. Presumably this variable operates at the group level. However, if a researcher changed the unit of measurement of the variable and asked persons how big the group was, the variable will still likely operate at the group level, not at the individual level.

A related issue is that sometimes a researcher aggregates across units (i.e., averages) and so changes the unit of measurement. For example, to measure organizational climate, the mean of individual measures might be used. Just because the mean is at the level of the organization, does not mean that it, in fact, operates at that level.

## Unit of Assignment or Sampling

A final consideration in the decision about the unit of analysis is design factors. It is necessary to consider the unit by which observations are selected to enter the study or are assigned to levels of the independent variable. A good idea is to perform the statistical analysis at the level of the selection or assignment. So, for instance, if floors in a dormitory are assigned to experimental conditions, dormitory floor, not person, should be the unit of analysis. This is not a "hard-and-fast rule," just a helpful guideline. For instance, individuals may be the unit of assignment, but if individuals interact with one another, then it may not be possible to use individual as the unit of analysis.

## How Do I Conduct the Analysis?

There are three major approaches to the unit of analysis question when persons are nested within groups (or observations are nested within persons) and is based on discussion in Kenny (1996):

- **Aggregation:** Determine the lowest level at which observations are independent and then average scores of both the causal and outcome measures at that level. For instance, if children are nested in classrooms, which are nested in schools, make school the unit of analysis. Child is the lowest level and school is the highest level. If there are no school or classroom effect, then child would be the unit of analysis. If there were no school effects, but there were classroom effects, then classroom would be the unit of analysis. If there were school effect, then school would be the unit of analysis. This strategy is advisable when the causal variables are measured at the level of aggregation or when most of the variation in the causal variable is at that level. Thus, when scores are aggregated on the causal variable, they are essentially the same.
- **Within analysis:** Determine the lowest level at which observations are not independent and conduct the analysis within each of these units and within each school. Save the estimates from these separate analyses and then test if the mean of the

estimates is different from zero. This strategy is advisable if the causal variable varies considerably within the nonindependent units. So for instance, if classrooms were not independent and gender of student was an independent variable, then one would compute the mean difference between boys and girls for each classroom.

- **Combined or pooled analysis:** Multilevel or hierarchical linear modeling essentially combines the two above strategies. In essence, it solves the unit of analysis question by making it a pseudo question. All the observations are analyzed, and the degree of nonindependence is empirically estimated. (This strategy is virtually required when units are crossed.)

There are then two key questions in determining the unit of analysis. First, a determination must be made about the lowest level of units that are independent. Often statistical analysis is necessary to determine the extent to which units are independent (though this can be tricky: see Kenny, Kashy, & Bolger's (1998) concept of "consequential nonindependence"). Second, a determination must be made about the degree of variation in the causal variable. If most of its variation is between the nonindependent units, then aggregation or averaging should be used. If not, then the within analysis should be used.

Sometimes, rules about the unit of assignment and the unit of generalization will be violated. For instance, classrooms may be the unit of assignment, but if there is no evidence of nonindependence due to classroom, person can be the unit of analysis. Alternatively, if there is evidence that classrooms are nonindependent, then person should not be the unit of analysis, even if person is the unit of generalization. Because all of the variation of treatment is between classrooms (recall that classroom is the unit of assignment), then the treatment's effect will be seen in between classroom variation, not within classroom.

---

## References

Kenny, D. A. (1996). The design and analysis of social-interaction research. *Annual Review of Psychology*, 7, 59-86.

Kenny, D. A., & Judd, C. M. (1986). Consequences of violating the independence assumption in analysis of variance. *Psychological Bulletin*, 99, 422-431.

Kenny, D. A., & Judd, C. M. (1996). A general procedure for the estimation of interdependence. *Psychological Bulletin*, 119, 138-148.

Kenny, D. A., Kashy, D. A., & Bolger, N. (1998). Data analysis in social psychology. In D. Gilbert, E. Fiske, & G. Lindzey (Eds.), *Handbook of social psychology* (4th ed., Vol. 1,

=p. 233-265). Boston, MA: McGraw-Hill.

Robinson, W. S. (1950). Ecological =orrelations and the behavior of individuals. *American Sociological Review*, =5, 351-357.

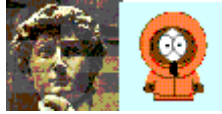

[Go =ack to the homepage.](#)
